# Supplementary material
Source: publisher figshare collection journal article supplement (https://adisjournals.figshare.com/ndownloader/files/38093682)
Supplement: Supplementary file 1 [file 38093682]

## Mitotane: Adis Evaluation

### Clinical Considerations

- An adrenal cytotoxic agent that, to date, is the only drug specifically approved for the treatment of ACC
- Recommended (in combination with etoposide, doxorubicin and cisplatin) as first-line treatment for advanced disease
- Also has a role in the adjuvant setting and a potential role in the neoadjuvant therapy setting
- Adverse events are generally reversible with dose reduction or treatment interruption
- Regular monitoring of plasma drug concentrations is necessary during treatment to optimise drug efficacy and safety

### Plain Language Summary

#### *Background and rationale*

- Adrenocortical carcinoma (ACC), a rare and aggressive cancer of the adrenal glands, is associated with a poor prognosis.
- Radical surgery remains the only potentially curative treatment; however, in many cases the cancer is only diagnosed in an advanced stage and surgical resection may not be feasible. Furthermore, even with complete surgical resection, disease recurrence is common.
- Besides surgery, treatment options for ACC remain very limited. Indeed, mitotane (Lysodren®), a derivative of the insecticide DDT, is currently the only drug specifically approved for the treatment of ACC.

#### *Clinical findings*

- Mitotane has been shown to provide clinically significant benefit when surgery is not feasible or when used following surgery for the prevention (or delay) of disease recurrence (adjuvant therapy).
- The side effects of mitotane are generally manageable (and resolve following dose reduction or treatment interruption) although regular monitoring of mitotane concentrations in blood is necessary during treatment to optimise drug effectiveness and safety.

#### *Conclusion*

Mitotane remains the cornerstone of systemic treatment for ACC, both in the unresectable/metastatic disease and adjuvant therapy settings.

This plain language summary represents the opinions of the author. For a full list of declarations, including funding and author disclosure statements, and copyright information, please see the full text online. © Springer Nature Switzerland AG 2022.
